# Supplementary material
Source: PubMed Central journal article supplement (PMC9371459)

Figure 1. Proportion of Clients Using Drugs by Type and Administration

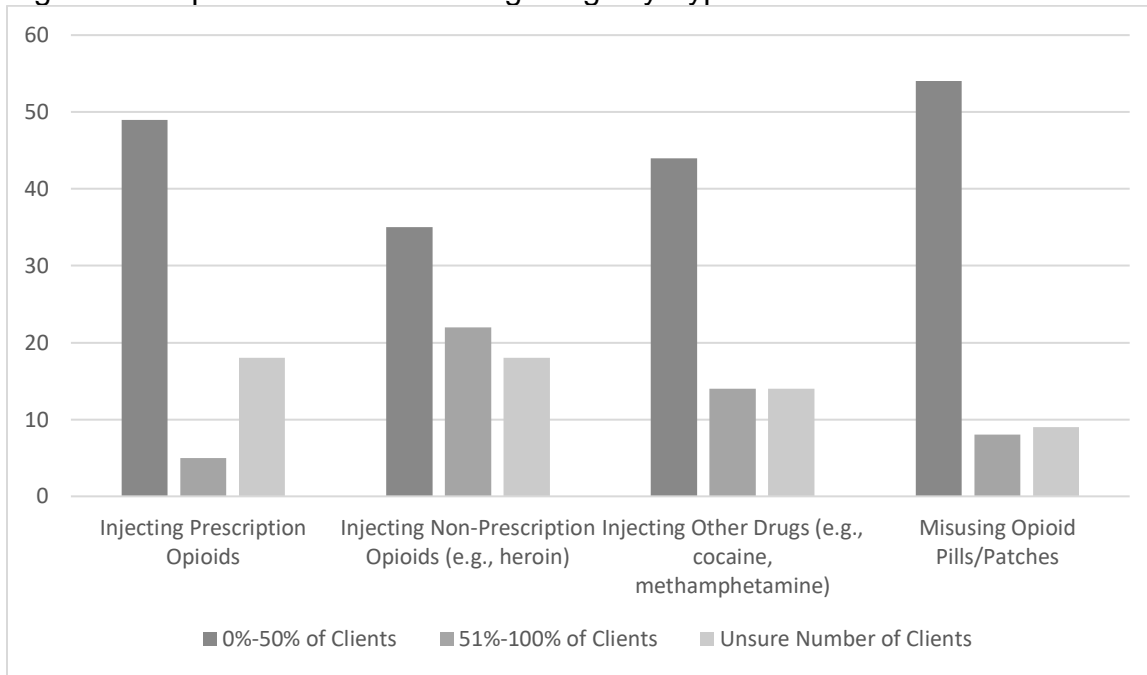

Supplement: NIHMS1768623-supplement-Supplemental_figure.pdf [file NIHMS1768623-supplement-Supplemental_figure.pdf]
