# Supplementary material
Source: PubMed Central journal article supplement (PMC9371459)
Supplement: NIHMS1768623-supplement-Supplemental_table.pdf [file NIHMS1768623-supplement-Supplemental_table.pdf]

**Supplemental Table 1. Providers' Attitudes Toward Caring For People with HCV**

|                                                                          | Overall Sample<br>Mean (SD) | Prescribers<br>Mean (SD) | Non-Prescribers<br>Mean (SD) |
|--------------------------------------------------------------------------|-----------------------------|--------------------------|------------------------------|
| Attitudes and self-reported compassion toward people with hepatitis C    | 1.66 (.90)                  | 1.36 (.63)               | 1.73 (.94)                   |
| Attitudes and self-reported willingness to treat people with hepatitis C | 1.51 (.63)                  | 1.64 (.56)               | 1.48 (.65)                   |
| Attitude and self-reported fear of contracting hepatitis C               | 4.49 (.64)                  | 4.71 (.51)               | 4.43 (.65)                   |
| Attitudes and self-reported hostility toward injecting drug users        | 4.31 (.63)                  | 4.50 (.60)               | 4.26 (.64)                   |

NOTE: The range of possible scores is 1-5. For compassion and willingness to treat, **lower scores** indicate greater compassion and greater willingness to provide care. For fears of contracting HCV and hostility toward PWID, **higher scores** indicate lower fear of contracting HCV and lower hostility toward people with HCV.
